# Supplementary material
Source: MDPI journal article supplement (https://www.mdpi.com/1999-4893/16/5/219)
Supplement: s1 [file s1]

Table S1: The training set for identification of integrated rating mechanism (decisions' root).

| Subgroups of subjects                                             | Group | encoded L_BV | encoded R_BV | encoded L_TV | encoded R_TV | Frequency |
|-------------------------------------------------------------------|-------|--------------|--------------|--------------|--------------|-----------|
| sub067, sub077                                                    | CON   | 1            | 1            | 1            | 1            | 2         |
| sub061                                                            | CON   | 1            | 1            | 1            | 2            | 1         |
| sub064, sub065, sub074                                            | CON   | 1            | 1            | 2            | 2            | 3         |
| sub066                                                            | CON   | 1            | 1            | 2            | 3            | 1         |
| sub009                                                            | AD    | 1            | 2            | 1            | 2            | 1         |
| sub053                                                            | AD    | 1            | 2            | 2            | 2            | 1         |
| sub019                                                            | AD    | 1            | 2            | 3            | 3            | 1         |
| sub005                                                            | AD    | 1            | 3            | 2            | 2            | 1         |
| sub008                                                            | AD    | 1            | 3            | 2            | 3            | 1         |
| sub047                                                            | AD    | 1            | 3            | 3            | 3            | 1         |
| sub062                                                            | CON   | 2            | 1            | 1            | 1            | 1         |
| sub015, sub023, sub030, sub041                                    | AD    | 2            | 1            | 2            | 2            | 4         |
| sub027, sub039, sub056                                            | AD    | 2            | 1            | 3            | 3            | 3         |
| sub080                                                            | CON   | 2            | 2            | 1            | 1            | 1         |
| sub070, sub072                                                    | CON   | 2            | 2            | 1            | 2            | 2         |
| sub046                                                            | AD    | 2            | 2            | 2            | 1            | 1         |
| sub011, sub013, sub021, sub036, sub054                            | AD    | 2            | 2            | 2            | 2            | 5         |
| sub010                                                            | AD    | 2            | 2            | 2            | 3            | 1         |
| sub052                                                            | AD    | 2            | 2            | 3            | 2            | 1         |
| sub024, sub028, sub029, sub035, sub037,<br>sub038, sub044, sub049 | AD    | 2            | 2            | 3            | 3            | 8         |
| sub017                                                            | AD    | 2            | 3            | 2            | 1            | 1         |
| sub045, sub051                                                    | AD    | 2            | 3            | 3            | 3            | 2         |
| sub043                                                            | AD    | 3            | 1            | 1            | 2            | 1         |
| sub022                                                            | AD    | 3            | 1            | 3            | 3            | 1         |
| sub001                                                            | AD    | 3            | 2            | 1            | 1            | 1         |
| sub014, sub016, sub032, sub033, sub058                            | AD    | 3            | 2            | 2            | 2            | 5         |
| sub012                                                            | AD    | 3            | 2            | 3            | 2            | 1         |
| sub002, sub018, sub020, sub025, sub034,<br>sub048, sub055         | AD    | 3            | 2            | 3            | 3            | 7         |
| sub069                                                            | CON   | 3            | 3            | 1            | 1            | 1         |
| sub050                                                            | AD    | 3            | 3            | 2            | 3            | 1         |
| sub026, sub040                                                    | AD    | 3            | 3            | 3            | 3            | 2         |
